# Supplementary material for: 3D tracking of single nanoparticles and quantum dots in living cells by out-of-focus imaging with diffraction pattern recognition
Source: PubMed Central journal article supplement (PMC4630642; doi:10.1038/srep16088), 2015-11-03
Supplement: srep16088-s1.pdf [file srep16088-s1.pdf]

# 3D tracking of single nanoparticles and quantum dots in living cells by out-of-focus imaging with diffraction pattern recognition

*Lucia Gardini<sup>1</sup>, Marco Capitanio<sup>\*1,2</sup>, and Francesco S. Pavone<sup>1,2,3,4</sup>*

<sup>1</sup> LENS - European Laboratory for Non-linear Spectroscopy, Via Nello Carrara 1, 50019 Sesto Fiorentino, Italy; <sup>2</sup> Department of Physics and Astronomy, University of Florence, Via Sansone 1, 50019 Sesto Fiorentino, Italy; <sup>3</sup> National Institute of Optics–National Research Council, Largo Fermi 6, 50125 Florence, Italy; <sup>4</sup> International Center of Computational Neurophotonics, Via Nello Carrara 1, 50019, Sesto Fiorentino (FI), Italy

Contact information: \* [capitan@lens.unifi.it](mailto:capitan@lens.unifi.it)

## The experimental setup

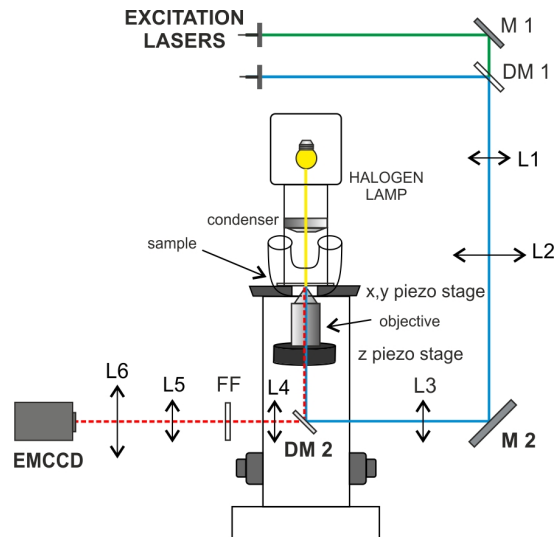

**Supplementary figure S 1** Scheme of the optical setup.

Our experimental setup, shown in figure S1, is equipped with 2 visible lasers for fluorescence excitation: Coherent Sapphire laser 532 nm (for fluorescent nanobeads excitation) and Argon 488 nm (for QDs excitation). The two lasers are coupled on the same path through a dichroic mirror (DM1). After the dichroic mirror, the beams are magnified by a telescope composed by achromatic doublets L1 and L2 and directed toward the objective axis through mirror M2. Another achromatic doublet L3 focuses the excitation beam on the back focal plane of the objective, which is mounted on a commercial inverted microscope Nikon ECLIPSE TE300. The 60X oil immersion objective (Nikon Plan Apo TIRF, 1.45 oil) produces a collimated excitation beam, for wide-field illumination, and collects the fluorescence signal emitted from the sample. The sample is mounted on a x, y piezo stage (P-527.2CL Phyisk Instrumente), while the objective can be moved along its optical axis through a piezo translator (P-721.C PIFOC Phyisk Instrumente). The dichroic mirror DM2 separates excitation from emission light, which passes through the emission filter FF prior to entering the detection path. For fluorescent beads imaging, Semrock LPD01-532RS-25 dichroic mirror and Semrock FF01-585/40 emission filter were used, whereas for Quantum Dot imaging (655 nm emission wavelength) Semrock FF500/646-Di01-25x36 dichroic mirror and Semrock FF01-655/40 emission filter were used. The microscope image is then projected by the tube lens L4 onto the EMCCD camera (Andor, Ixon X3), after an additional 3x magnification by the telescope L5, L6.

# Pattern-Recognition Out-Of-Focus (PROOF) Imaging Software

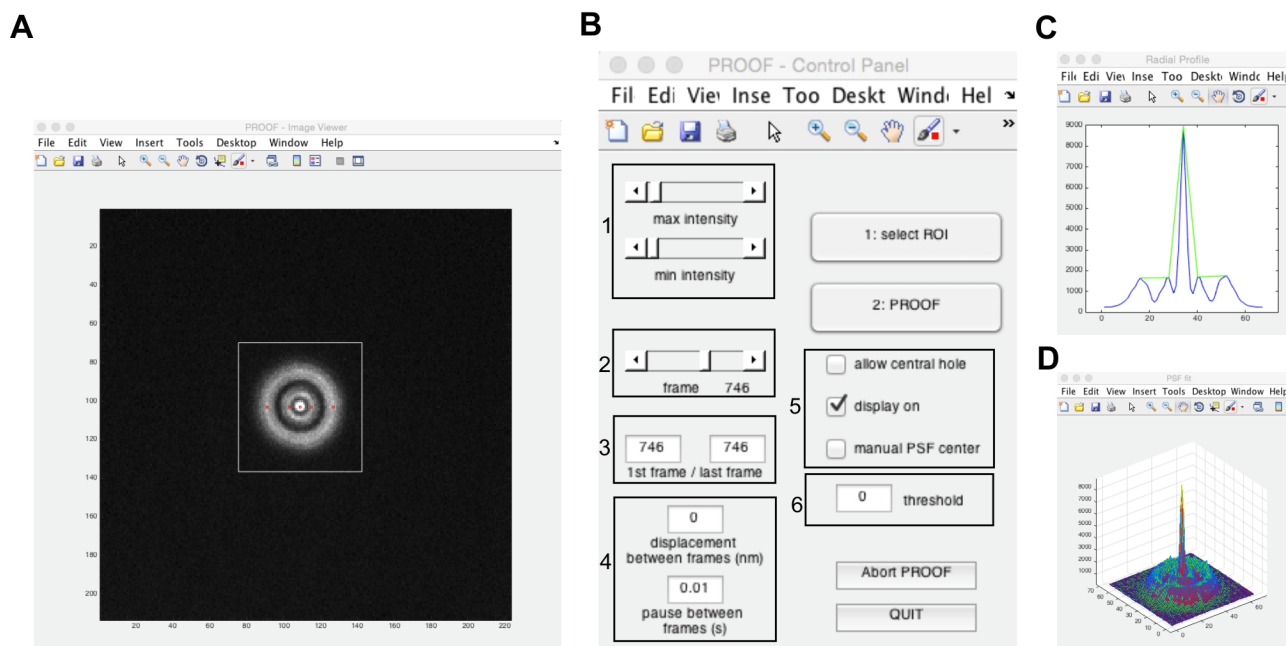

Supplementary figure S 2 PROOF software interface.

PROOF is a custom-written software developed in Matlab for 3D localization of single fluorescent nanoparticles. PROOF automatically recognizes the number of rings in the diffraction pattern of single emitters and, according to this number, it selects an appropriate function to fit experimental data through weighted least squares method. PROOF opens, visualizes and analyzes images of diffraction patterns of both in-focus and out-of-focus fluorescent probes. PROOF allows selecting a Region Of Interest (ROI) that includes the image of the fluorescent particle and produces an output '.txt' file containing its x, y position as well as the radius of the outermost ring  $R_N$  (if any) of its diffraction pattern. By converting  $R_N$  to z through an appropriate calibration function, the axial position of the particle can be precisely determined.

The software is provided in the "PROOF" folder, which contains the main program (PROOF) and all the functions that are called from there. The "PROOF" folder should be added by the user through the File<Set path option in the Matlab window.

When PROOF is launched from the Matlab command window, the user is asked to browse for the file to be opened for analysis. PROOF can open stacks of '.tiff' images as well as single '.tiff' images. Once the image stack is completely uploaded, panels A and B, shown in figure S2, appear. Panel A is the Image Viewer, in which the image can be zoomed in and out, saved and displayed using the standard commands of Matlab windows.

Panel B is the Control Panel, through which additional visualization parameters as well as all the analysis parameters can be set.

By changing the position of the sliders highlighted by square 1 on the Control Panel, intensity level of the image can be adjusted to the desired values, to achieve optimal visualization for the user. The slider inside square 2 is used to browse through different

frames of the stack. Values in square 3 can be changed to select the range of frames to be analyzed.

“Displacement between frames” in square 4 represents the maximum distance (in nm) travelled by the particle per frame. The default value is zero, which is useful when the probe is not moving in the x-y plane, as during calibration. On the opposite, when this is set to a value different from 0, the ROI on which the analysis is performed (white square in panel A) is correspondingly enlarged between successive frames to find the new pattern center. In particular, the new center of the diffraction pattern is localized as either the maximum intensity pixel or as the ROI centroid, depending on the button “allow central hole” described below, and the ROI is centered on the new pattern center and resized to its original dimensions to analyze the frame.

The value “pause between frames” in square 4 allows the user to introduce a pause between the analysis of subsequent frames. This can be useful for visually inspecting images and fits during the analysis.

Additional options are available to users through the checkboxes highlighted by square 5. The “allow central hole” option should be selected for the analysis of Quantum Dot diffraction patterns in axial regions where they are transitioning between different numbers of rings. As described in the article, a peculiar feature of QDs is the appearance of a central hole in the diffraction intensity pattern at some axial positions. In these particular cases, the software will detect an even number of peaks, which is usually forbidden unless this button is pressed. If this option is enabled, whenever an even number of peaks is found, the user is asked to confirm this number, or to reject it by taking the number of peaks from the previous frame, or to skip the frame.

The “display on” option should be checked if the user wants to visualize the radial profile image (panel C) and the three-dimensional fit (panel D) during the analysis.

The “manual PSF center” option gives the opportunity to manually select the ROI center at each frame, by clicking on the desired position in the image viewer with the central mouse button. This option can be useful in cases in which automatic centering is not accurate (usually because of poor signal-to-noise ratio), which can especially deteriorate radial profile calculation.

Finally, the “threshold” value in square 6 must be set during the analysis of diffraction patterns of single QDs. In this case, whenever the average intensity within the ROI falls below the threshold value, typically because of blinking events, the frame is skipped. On the other hand, in the case of fluorescent beads, which are not affected by blinking, this parameter should be set to 0 (default value).

Before starting the analysis, the button “1:select ROI” must be pressed to select a region of interest in the image viewer. A white square can be drawn around the particle of interest, by selecting in sequence the top-left corner (left mouse click), the bottom-right corner (right mouse click) and the center of the ROI (middle mouse click). The middle mouse click terminates ROI selection. The ROI is always resized as square, for proper radial profile calculation. The ROI can be re-adjusted by pressing the “1:select ROI” button again.

The button “2: PROOF” should be pressed to start the analysis after all the analysis parameters are properly set and the ROI has been selected. Even so, all checkboxes as

well as “threshold”, “distance between frames”, and “pause between frames” can be modified while the analysis is running. The analysis is sequentially performed over the frame range selected by the user (square 3) as described below.

First, for each frame, the selected ROI is re-centered either on the pixel displaying the maximum intensity or on the ROI centroid, depending whether “allow central hole” is respectively off or on. Then, the average radial profile of the pattern is calculated, by step rotations around the ROI center and subsequent averaging. The result of this computation is displayed in the Radial Profile window (panel C). From the radial profile, the local maxima (peaks), i.e. data samples that are larger than their two neighboring samples, are detected and displayed in the Radial Profile window (green lines in panel C) and on the diffraction pattern image (red dots in panel A). The number, the coordinates and the amplitudes of peaks are used to calculate the initial parameters for the fitting function  $f$  described in details in the article. The fit is shown in the PSF fit window (panel D), in which the fitting function (red surface) is superimposed to the data (green).

After the last frame is analyzed, the user is requested to save the analysis results (described below in “the output file” section) to a desired location within the image stack directory. At this point, the user can change the analysis parameters and the ROI and start a new analysis. If a new ROI is not selected, the previous one is used.

Buttons “Abort” and “Quit” respectively terminate the analysis and the program. When “Abort” is pressed the analysis stops and analysis results can be saved up to the last frame analyzed. When “Quit” is pressed the program is closed without saving analyzed data. Alternatively, the program can be interrupted whenever desired by typing “ctrl+c” in the Matlab command window.

## The Configuration file

```

91.11 nm/pixel camera_calibration
50 MIN_PEAK_HEIGHT+bgmean
3 MIN_PEAK_DISTANCE
9 N_PEAKS
-in_focus
0.11 P2
-1_ring
0.22 P2
0.15 P4=P2*...
-2_rings
0.22 P2
0.5 P4=P2*...
0.2 P6=P2*...
-3_rings
0.22 P2
0.5 P4=P2*...
0.4 P6=P2*... |
0.1 P8=P2*...
-4_rings
0.23 P2
1.2 P4=P2*...
0.5 P6=P2*...
0.6 P8=P2*...
0.13 P10=P2*...

```

**Supplementary figure S 3** Configuration file.

A “PROOFconfig.txt” file allows the user to set additional analysis parameters, which mainly depends on the imaging system and microscope magnification (figure S3). This file should be placed in the same directory of the “PROOF.m” file.

The first parameter is the pixel size of the image (in nm/pixel). “MIN\_PEAK\_HEIGHT+bgmean”, “MIN\_PEAK\_DISTANCE”, and “N\_PEAKS” are arguments of the ‘findpeaks’ Matlab function used for peaks detection from the average radial profile. “MIN\_PEAK\_HEIGHT+bgmean” is the minimum intensity value over the background for a peak to be detected. The background level is calculated as the average intensity over a 5x5 pixels matrix in the ROI top-left corner. “MIN\_PEAK\_DISTANCE” is the minimum allowed distance (in pixels) between adjacent local maxima (peaks). “N\_PEAKS” is the maximum number of peaks that can be detected. In the present version (v1.0), the software can analyze diffraction patterns containing up to 9 peaks, correspondent to 4 Gaussian rings plus a central Gaussian peak.

The parameters listed below represent the initial guess for P2, which is related to the standard deviation of the central Gaussian profile  $\sigma_0$ , and the initial guesses for P4, P6, P8 and P10, which are respectively related to the standard deviations of the Gaussian rings  $\sigma_1, \sigma_2, \sigma_3, \sigma_4$ , as defined in equation (1):

$$f = B_0 + A_0 \cdot \exp\left(-\frac{(x-x_0)^2 + (y-y_0)^2}{2\sigma_0^2}\right) + \sum_{i=1}^N A_i \cdot \exp\left(-\frac{\left(\sqrt{(x-x_0)^2 + (y-y_0)^2} - R_i\right)^2}{2\sigma_i^2}\right) \quad (1)$$

In particular,  $P2 = 1/2\sigma_0^2$ ,  $P4 = 1/2\sigma_1^2$ ,  $P6 = 1/2\sigma_2^2$ ,  $P8 = 1/2\sigma_3^2$  and  $P10 = 1/2\sigma_4^2$ . These values depend on the microscope magnification, on the camera pixel size, as well as optical aberrations that affects the PSF. These parameters can be set independently for fit functions with different number of rings (Fig. S3). In the configuration file, P2 is expressed as an absolute value, whereas P4-P10 are expressed as relative values to P2. For example, if the values in the configuration file for 1-ring function are P2=0.22 and P4=0.15, we get  $\sigma_0 = 1/\sqrt{2*P2} = 1.51$  pixel and  $\sigma_1 = 1/\sqrt{2*P4} = 1/\sqrt{2*0.15*P2} = 3.89$  pixel. In our setup, standard deviations of Gaussian rings are usually larger than the standard deviation of the central Gaussian profile, so that P4-P10 are usually <1.

Since P2-P10 depends on the optical setup only, they should be set once for a given setup. A way to set initial guesses is to make a z-scan of a single emitter and roughly measure the width of the central Gaussian profile and rings from the emitter images to set P2-P10. After one round of PROOF analysis, better estimates of the initial guesses can be obtained from average values of P2-P10 reported in the output file (see next section).

The other initial parameters for the fitting function, such as  $B_0$ ,  $A_0$ ,  $A_i$ , and  $R_i$  are measured automatically from the radial intensity profile and do not need any setting.

The configuration file can be modified before each “PROOF” analysis cycle and should be saved (as .txt, ANSI extension) for the changes to be applied.

# The Output file

| x pxls     | y pxls     | B <sub>0</sub> | A <sub>0</sub> | P <sub>2</sub> | A <sub>1</sub> | P <sub>4</sub> | R <sub>1</sub> | A <sub>2</sub> | P <sub>6</sub> | R <sub>2</sub> | A <sub>3</sub> | P <sub>8</sub> | R <sub>3</sub> | A <sub>4</sub> | P <sub>10</sub> | R <sub>4</sub> | fval         |
|------------|------------|----------------|----------------|----------------|----------------|----------------|----------------|----------------|----------------|----------------|----------------|----------------|----------------|----------------|-----------------|----------------|--------------|
| 109.401121 | 103.415049 | 221.175915     | 2861.812829    | 0.178286       | 754.387643     | 0.214198       | 5.822172       | 483.822031     | 0.182800       | 11.809905      | 415.110037     | 0.118405       | 19.889330      | 570.981227     | 0.028015        | 32.873310      | 62111.878344 |
| 109.402920 | 103.438349 | 221.182878     | 2822.141516    | 0.180621       | 717.878389     | 0.205413       | 5.588742       | 497.919270     | 0.189718       | 11.845436      | 420.899318     | 0.117189       | 19.886213      | 571.041172     | 0.028134        | 32.803978      | 61700.720780 |
| 109.418400 | 103.449303 | 221.078805     | 2741.921279    | 0.173711       | 723.747431     | 0.197219       | 5.131413       | 492.730714     | 0.185883       | 11.798445      | 419.879509     | 0.115028       | 19.881814      | 570.900298     | 0.028190        | 32.818812      | 61888.477874 |
| 109.424815 | 103.452917 | 220.104424     | 3070.739215    | 0.188934       | 774.499219     | 0.217749       | 5.890176       | 488.031714     | 0.190889       | 11.054958      | 418.054434     | 0.121922       | 20.181340      | 566.181041     | 0.028120        | 33.100588      | 61000.487198 |
| 109.412007 | 103.439970 | 210.764844     | 3008.868818    | 0.181771       | 780.388211     | 0.218804       | 5.731149       | 483.387880     | 0.182443       | 11.058412      | 407.828383     | 0.120212       | 20.173789      | 558.341362     | 0.027924        | 33.118984      | 61481.388918 |
| 109.412811 | 103.417446 | 220.780182     | 2842.404817    | 0.188890       | 750.327071     | 0.219309       | 5.738417       | 447.126188     | 0.180877       | 11.038113      | 408.374699     | 0.120302       | 20.178013      | 548.197918     | 0.027948        | 33.108700      | 60400.718448 |
| 109.417507 | 103.473270 | 221.188199     | 2841.138411    | 0.188284       | 751.727187     | 0.218143       | 5.750823       | 449.423027     | 0.181304       | 11.064880      | 407.422431     | 0.121992       | 20.183881      | 550.888844     | 0.028438        | 33.112800      | 60184.038801 |
| 109.443929 | 103.474989 | 220.444481     | 3004.116313    | 0.183178       | 780.128890     | 0.200744       | 5.728430       | 458.116181     | 0.181993       | 11.044813      | 407.117780     | 0.121882       | 20.178471      | 551.407887     | 0.028007        | 33.108700      | 60170.781871 |
| 109.442798 | 103.462138 | 221.150080     | 3095.131238    | 0.190494       | 711.932170     | 0.218221       | 5.729888       | 449.913398     | 0.181212       | 11.037999      | 398.788787     | 0.121090       | 20.174217      | 541.950122     | 0.028199        | 33.108149      | 61144.283480 |
| 109.421002 | 103.468158 | 221.184109     | 2931.821211    | 0.181888       | 781.478609     | 0.218309       | 5.719000       | 450.981819     | 0.184847       | 11.044813      | 405.889185     | 0.121889       | 20.180407      | 541.024798     | 0.027877        | 33.107188      | 61011.381450 |
| 109.416188 | 103.473904 | 219.497998     | 3070.794012    | 0.181240       | 776.994833     | 0.218317       | 5.720999       | 458.177383     | 0.180581       | 11.049549      | 409.831711     | 0.123485       | 20.183182      | 551.857388     | 0.027886        | 33.119715      | 62038.888821 |
| 109.448188 | 103.474207 | 220.773884     | 3044.197100    | 0.189710       | 774.851811     | 0.218883       | 5.718488       | 454.901514     | 0.180581       | 11.037842      | 403.174337     | 0.123404       | 20.180814      | 551.198421     | 0.028113        | 33.124796      | 61980.750095 |
| 109.438737 | 103.491270 | 221.101117     | 3012.728880    | 0.184988       | 780.831327     | 0.217313       | 5.718493       | 454.974217     | 0.180901       | 11.017138      | 408.743902     | 0.123013       | 20.183773      | 550.181200     | 0.027989        | 33.133987      | 62000.106117 |
| 109.439774 | 103.488908 | 219.082838     | 3131.128119    | 0.214847       | 800.480230     | 0.217993       | 5.749951       | 452.932138     | 0.181970       | 11.047800      | 418.183388     | 0.123204       | 20.188711      | 549.138071     | 0.027915        | 33.127722      | 62174.997311 |
| 109.448903 | 103.488900 | 221.197333     | 3142.141139    | 0.218418       | 810.149091     | 0.218184       | 5.781150       | 461.889415     | 0.181583       | 11.056819      | 420.888153     | 0.124275       | 20.194201      | 549.498011     | 0.027921        | 33.131990      | 62148.811281 |
| 109.477840 | 103.488811 | 221.148406     | 3173.499212    | 0.208714       | 841.648181     | 0.218142       | 5.819113       | 461.880748     | 0.181173       | 11.111111      | 411.119138     | 0.126206       | 20.190109      | 548.808211     | 0.027781        | 33.121091      | 62148.811281 |
| 109.448801 | 103.448898 | 220.197187     | 3446.120710    | 0.218111       | 810.202851     | 0.218998       | 5.791219       | 454.760477     | 0.181745       | 11.188158      | 428.777729     | 0.121848       | 20.191189      | 571.021021     | 0.027820        | 33.127187      | 62174.141001 |
| 109.473884 | 103.459929 | 221.170188     | 3177.091910    | 0.218442       | 810.810201     | 0.218783       | 5.808004       | 458.188781     | 0.180818       | 11.028018      | 428.888887     | 0.126018       | 20.177149      | 549.274748     | 0.027898        | 33.107188      | 62011.888101 |
| 109.451948 | 103.451921 | 221.144178     | 3199.099719    | 0.210712       | 851.020211     | 0.218388       | 480.188714     | 458.188781     | 0.181879       | 11.131211      | 428.888887     | 0.126018       | 20.182145      | 549.907888     | 0.027911        | 33.121184      | 62011.888101 |
| 109.451948 | 103.451921 | 220.123171     | 3197.099719    | 0.209718       | 851.020211     | 0.218388       | 480.188714     | 458.188781     | 0.181879       | 11.131211      | 428.888887     | 0.126018       | 20.182145      | 549.907888     | 0.027911        | 33.121184      | 62011.888101 |
| 109.488421 | 103.488411 | 221.188113     | 3191.128919    | 0.219499       | 851.020211     | 0.218388       | 5.097318       | 458.188780     | 0.181375       | 11.088881      | 428.117790     | 0.127018       | 20.188881      | 570.119208     | 0.027803        | 33.124811      | 62199.188811 |
| 109.459820 | 103.442311 | 220.071898     | 3198.107118    | 0.207080       | 850.810919     | 0.218998       | 5.898212       | 451.709812     | 0.181811       | 11.128301      | 423.691823     | 0.126789       | 20.198481      | 568.228311     | 0.028131        | 33.121188      | 61380.028981 |
| 109.488421 | 103.488411 | 221.188113     | 3191.128919    | 0.219499       | 851.020211     | 0.218388       | 5.097318       | 458.188780     | 0.181375       | 11.088881      | 428.117790     | 0.127018       | 20.188881      | 570.119208     | 0.027803        | 33.124811      | 62199.188811 |
| 109.481138 | 103.482317 | 221.081890     | 3149.131493    | 0.218411       | 787.892919     | 0.200111       | 5.874013       | 418.189317     | 0.180907       | 11.114319      | 397.039821     | 0.124882       | 21.004414      | 540.184181     | 0.028007        | 34.180847      | 61111.178443 |
| 109.458023 | 103.481818 | 221.174818     | 3086.809844    | 0.216144       | 810.807627     | 0.218388       | 5.888388       | 458.000781     | 0.181937       | 11.087900      | 408.458003     | 0.126118       | 21.004414      | 541.188019     | 0.027813        | 34.119700      | 61111.178443 |
| 109.441921 | 103.413403 | 221.089200     | 3792.030983    | 0.244548       | 818.484841     | 0.219930       | 5.877974       | 428.792048     | 0.184988       | 11.147977      | 411.042838     | 0.128111       | 21.037174      | 547.087710     | 0.027488        | 34.171183      | 79977.248017 |
| 109.457121 | 103.450112 | 220.908713     | 3044.128119    | 0.248068       | 801.198219     | 0.218394       | 5.888460       | 421.121121     | 0.182312       | 11.080730      | 408.111289     | 0.128122       | 21.054282      | 540.708882     | 0.027451        | 34.182289      | 80388.002881 |

## Supplementary figure S 4 Example of output file.

When the analysis is completed, the user is asked to save the analysis results. The output file is a '.txt' file in which data are organized as shown in figure S4. Each row corresponds to a frame ordered according to the frame sequence. The output file always starts from frame 1. If the analysis was performed from frame n>1, rows 1 to n are filled with zeros. "x pxls", "y pxls" are the coordinates of the center of the diffraction pattern, expressed in pixels. B<sub>0</sub>, A<sub>i</sub>, P<sub>i</sub> and R<sub>i</sub> are the parameters resulting from the fitting of the function f to the data. "fval" is the chi-square. In the example shown in figure S3, one central peak and 4 rings were detected and analyzed. In cases in which a lower number of rings is detected, higher-order parameters are filled with zeros.

## Neuroblastoma cells

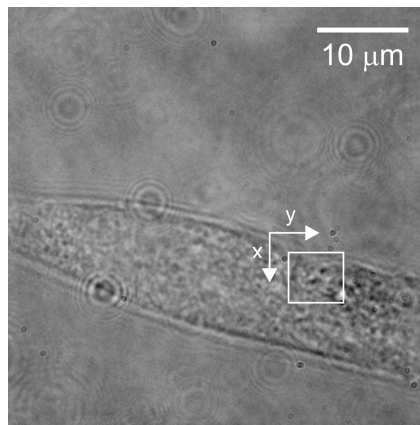

**Figure S 5** Bright-field image of a neuroblastoma cell. White square and x-y axes correspond respectively to the region spanned by the QD trajectory and associated axes orientation in fig.4a.

## Typical variations in calibration curves

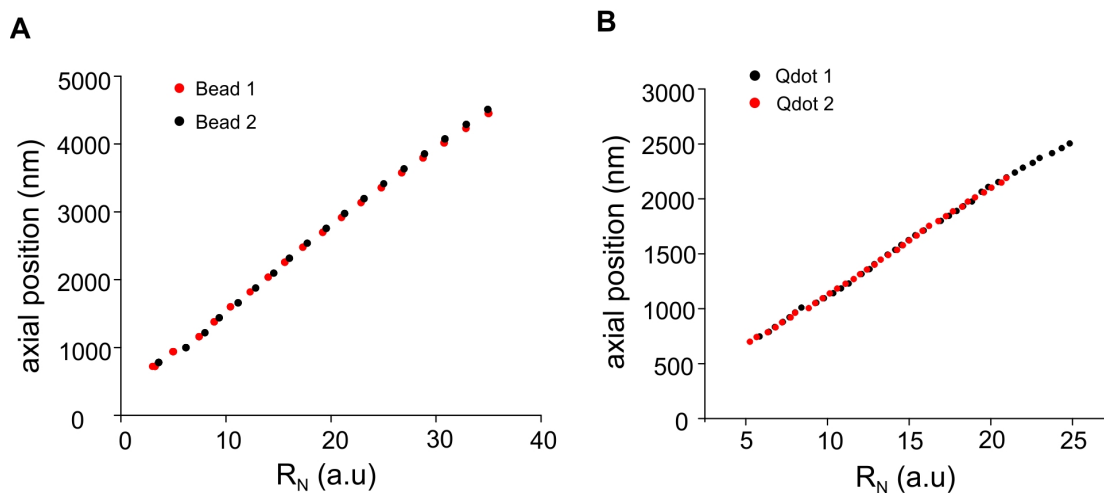

**Figure S 6 A)** Comparison between calibration curves obtained from two different fluorescent beads in 2% agarose. Bead 1 (red dots) is located on the coverslip surface, whereas Bead 2 (black dots) is located about 2.5  $\mu\text{m}$  deep inside the gel. **B)** Comparison between calibration curves obtained from two different QDots attached on the cell membrane (saline buffer media) in independent experiments (red and black dots).

Lens aberrations can affect the PSF shape and thus introduce systematic errors in probe localization. Aberrations are strongly dependent on many different parameters such as the optical components (objective, tube lens, magnification optics), refractive index mismatches, and depth of the probe in the sample. Here we evaluate whether typical variations of probe distance from the coverslip surface or different experimental conditions might influence the axial calibration and thus localization accuracy.

Fig. S6a shows a comparison between two calibration measurements obtained in 2% agarose, from fluorescent beads located either at the glass coverslip surface (red dots) or 2.5  $\mu\text{m}$  deep inside the gel (black dots). We sampled less points than in the calibration measurements displayed in Fig. 2 to avoid possible discrepancies between the two curves due to thermal drifts and fitted data points to get calibration curves as described in the article. We regarded variations in the distance between the two calibration curves as the error introduced by aberration effects owing to the different depth inside the sample. We quantified an average variation of 0.5 % in the axial region between 0.5 and 3.5  $\mu\text{m}$  from the focal plane, and about 2 % between 3.5 and 4.5  $\mu\text{m}$ .

Fig. S6b shows a comparison between calibration measurements obtained from two QDs attached to the membrane of two different neuroblastoma cells in two separate samples (black and red dots respectively). The two QDs were targeted to the membrane of fixed neuroblastoma cells as described in the article. Also in this case, we quantified variations in the distance between the two calibration curves, obtaining 0.5 % average variation over the entire calibration range.



## Variation of axial localization accuracy with signal-to-background ratio

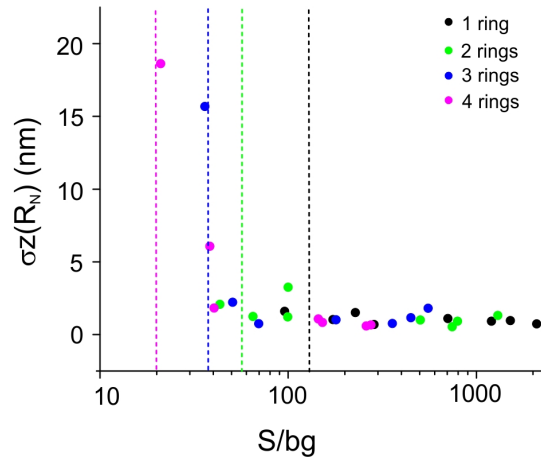

**Figure S 7)** Dependence of axial localization error  $\sigma_z(R_N)$  on signal-to-background ratio (log scale) in the presence of different number of rings in the diffraction pattern. The number of rings is color coded according to the legend in the plot. Dashed lines in the plot represent the average value of  $S/bg$  measured during QD calibration (fig. 3 in the article) for different number of rings.

As shown in figure S7, we evaluated how fluorescence background impacts the localization accuracy. We measured the signal-to-background ratio ( $S/bg$ ) of fluorescent nanobeads embedded in 2% agarose gel at four different axial positions, in which the PSF showed one to four diffraction rings. We varied the  $S/bg$  by changing the integration time and EMgain from 100 ms, 10X EMgain (same experimental conditions of the calibration described in the article) to 30 ms, no EMgain.  $S/bg$  ratio was calculated as

$$\frac{\langle I - bg \rangle}{\sigma_{bg}}$$

where  $I$  was calculated in a ROI surrounding the diffraction pattern and  $bg$  in an adjacent ROI of the same size, but containing no beads.  $\langle I - bg \rangle$  as well as  $\sigma_{bg}$  ( $bg$  standard deviation) were calculated over 10 subsequent acquisitions under the same imaging conditions. Localization accuracy  $\sigma_z(R_N)$  was calculated as the standard deviation of the localization over the 10 frames.

As shown in figure S7, the  $S/bg$  remains high and the localization accuracy stays within 2 nm when the diffraction pattern contains 1 or 2 rings, even at the fastest acquisition time. On the other hand, the  $S/bg$  diminishes when the number of rings increases to 3 and 4, thus affecting localization accuracy. Dashed lines in Fig. S7 represent the average value of  $S/bg$  measured during QD calibration (fig. 3 in the article) for different number of rings. It can be noticed that, for values of the  $S/bg$  correspondent to the far ends of QDs calibration curve, there is a rapid worsening of the axial localization accuracy up to a value of about 20 nm in the presence of 4 rings (about 2  $\mu\text{m}$  from the focal plane), in accordance with what is shown in the article, Fig. 3c.

From these measurements, it emerges that fluorescence background level inside a live cell can influence localization accuracy especially at the farthest distances from the focal plane, and should thus be taken into account when evaluating localization accuracy.
